# Supplementary material for: Effects of intermittent hypoxia on the cell survival and inflammatory responses in the intertidal marine bivalves Mytilus edulis and Crassostrea gigas
Source: Oxford University Press journal article supplement (doi:10.1242/jeb.217026), 2020-01-01
Supplement: jeb217026supp.pdf [file jeb217026supp.pdf]

**Table S1.** Principal component (PC) analysis of the stress biomarker profiles in the digestive gland of *M. edulis*.

Variables with high loadings on the respective PC (i.e. with the absolute value of the correlation coefficient >0.5) are highlighted in bold and red.

| PC number | Eigenvalue | % Total variance | Cumulative eigenvalue | Cumulative % |
|-----------|------------|------------------|-----------------------|--------------|
| 1         | 4,371913   | 33,63010         | 4,37191               | 33,6301      |
| 2         | 2,878956   | 22,14581         | 7,25087               | 55,7759      |
| 3         | 1,461839   | 11,24492         | 8,71271               | 67,0208      |
| 4         | 1,064906   | 8,19159          | 9,77761               | 75,2124      |
| 5         | 0,772798   | 5,94460          | 10,55041              | 81,1570      |
| 6         | 0,655006   | 5,03851          | 11,20542              | 86,1955      |
| 7         | 0,507750   | 3,90577          | 11,71317              | 90,1013      |
| 8         | 0,441991   | 3,39993          | 12,15516              | 93,5012      |
| 9         | 0,312821   | 2,40632          | 12,46798              | 95,9075      |
| 10        | 0,250074   | 1,92365          | 12,71805              | 97,8312      |
| 11        | 0,166488   | 1,28067          | 12,88454              | 99,1119      |
| 12        | 0,082542   | 0,63494          | 12,96708              | 99,7468      |
| 13        | 0,032916   | 0,25320          | 13,00000              | 100,0000     |

| Variable          | Factor loadings based on correlations |                  |                  |
|-------------------|---------------------------------------|------------------|------------------|
|                   | PC1                                   | PC 2             | PC3              |
| Caspase 2         | -0,401005                             | <b>-0,618211</b> | -0,224183        |
| Caspase 3         | <b>-0,837742</b>                      | -0,084785        | -0,181335        |
| Caspase 8         | <b>-0,717195</b>                      | -0,292993        | -0,295436        |
| TAK1              | <b>-0,565904</b>                      | -0,046684        | <b>-0,504317</b> |
| NF-κB             | <b>-0,735176</b>                      | -0,322469        | 0,229305         |
| Bcl-2             | <b>-0,608910</b>                      | 0,063702         | 0,228400         |
| BAX               | <b>-0,609359</b>                      | 0,173613         | <b>-0,547264</b> |
| IKKα              | 0,419785                              | <b>0,594705</b>  | -0,424704        |
| TBK1              | <b>-0,543942</b>                      | -0,042877        | 0,221162         |
| TBARS             | 0,325443                              | <b>-0,746336</b> | 0,186408         |
| NRR               | <b>0,682777</b>                       | 0,001376         | <b>-0,548485</b> |
| Cathepsin D total | -0,356237                             | <b>0,823031</b>  | 0,129514         |
| Cathepsin D free  | -0,470119                             | <b>0,820646</b>  | 0,226256         |

**Table S2.** Principal component (PC) analysis of the stress biomarker profiles in the digestive gland of *C. gigas*.

Variables with high loadings on the respective PC (i.e. with the absolute value of the correlation coefficient >0.5) are highlighted in bold and red.

| PC number | Eigenvalue | % Total variance | Cumulative Eigenvalue | Cumulative % |
|-----------|------------|------------------|-----------------------|--------------|
| 1         | 7,134833   | 54,88333         | 7,13483               | 54,8833      |
| 2         | 1,910867   | 14,69897         | 9,04570               | 69,5823      |
| 3         | 1,385330   | 10,65638         | 10,43103              | 80,2387      |
| 4         | 0,695269   | 5,34823          | 11,12630              | 85,5869      |
| 5         | 0,468452   | 3,60347          | 11,59475              | 89,1904      |
| 6         | 0,407127   | 3,13175          | 12,00188              | 92,3221      |
| 7         | 0,305348   | 2,34883          | 12,30723              | 94,6710      |
| 8         | 0,222869   | 1,71438          | 12,53009              | 96,3853      |
| 9         | 0,194611   | 1,49701          | 12,72471              | 97,8824      |
| 10        | 0,130942   | 1,00725          | 12,85565              | 98,8896      |
| 11        | 0,081688   | 0,62837          | 12,93734              | 99,5180      |
| 12        | 0,036101   | 0,27770          | 12,97344              | 99,7957      |
| 13        | 0,026563   | 0,20433          | 13,00000              | 100,0000     |

| Variable          | Factor loadings based on correlations |                  |                  |
|-------------------|---------------------------------------|------------------|------------------|
|                   | PC1                                   | PC2              | PC3              |
| Caspase 2         | <b>-0,862258</b>                      | 0,226480         | 0,056310         |
| Caspase 3         | -0,204913                             | 0,450020         | <b>-0,779008</b> |
| Caspase 8         | <b>-0,880418</b>                      | -0,178410        | 0,137842         |
| TAK1              | <b>-0,821681</b>                      | 0,237215         | 0,063673         |
| NF-κB             | <b>-0,664749</b>                      | <b>0,574869</b>  | -0,010685        |
| Bcl-2             | <b>-0,932299</b>                      | -0,093032        | -0,022755        |
| BAX               | <b>-0,563251</b>                      | <b>0,547934</b>  | 0,196998         |
| IKKα              | <b>-0,866568</b>                      | 0,361548         | -0,016142        |
| TBK1              | <b>-0,773454</b>                      | -0,098958        | -0,070868        |
| TBARS             | <b>-0,685870</b>                      | <b>-0,573139</b> | -0,105592        |
| NRR               | -0,108838                             | -0,273419        | <b>-0,831124</b> |
| Cathepsin D total | <b>-0,852292</b>                      | -0,471557        | 0,065614         |
| Cathepsin D free  | <b>-0,844333</b>                      | -0,404317        | 0,036141         |
